# Supplementary material
Source: PubMed Central journal article supplement (PMC6224775)
Supplement: mmc1.pdf [file mmc1.pdf]

YMTHE, Volume 26

## **Supplemental Information**

**CRISPR-Induced Deletion with SaCas9 Restores**

**Dystrophin Expression in Dystrophic Models**

***In Vitro and In Vivo***

**Benjamin L. Duchêne, Khadija Cherif, Jean-Paul Iyombe-Engembe, Antoine Guyon, Joel Rousseau, Dominique L. Ouellet, Xavier Barbeau, Patrick Lague, and Jacques P. Tremblay**

## Figure S1A.

### Exon 46 1-46

5' **GCTAGAAGAACAA**AAGAATATCTTGTCTCAGAATTTCAAAGAGATTTAAATGAATTTGTTTTATG 3'  
3' CGATCTTCTTGTGTTTTCTTATAGAACAGTCTTAAAGTTTCTCTAAATTTACTTAAACAAAATAC 3'

5' GTTGGAGGAAGCAGATAACATTGCTAGTATCCCACCTGAACTGGAAAAGAGCAGCAACTAAA 3'  
3' CAACCTCCTTCGTCTATTGTAACGATCATAGGGT**GAACTTGGACCTTTTCTCGTC**GTGATT 5'

2-46

5' AGAAAAGCTTGAGCAAGTCAAG 3'  
3' TCTTTTCGAACTCGTTCAGTTC 5'

### Exon 47 3-47

5' **TTACTGGTGG**AAGAGTTGCCCTGCGCCAGGGAATTCTCAAACAATTAAATGAACTGGAGGA 3'  
3' AATGACCACCTTCTCAACGGGGACGCGGTCCCTTAAGAG**TTTGTTAATTTACTTTGACCTCCT** 5'

4-47

5' CCCGTGCTTGTAAGTGCTCCATAAGCCCAGAAGAGCAAGATAAACTTGAAAATAAGCTCAAG 3'  
3' **GGGCACGAACATTACAGAGGGTATTC**GGGTCTTCTCGTTCTATTGAACTTTTATTCGAGTTC 5'

5-47

5' CAGACAAATCTCCAGTGGATAAAG 3'  
3' GTCTGTTTAGAGGTCACCTATTTTC 5'

### Exon 49

5' GAACTGAAATAGCAGTTCAAGCTAAACAACCGGATGTGGAAGAGATTTTGTCTAAAGGGCAG 3'  
3' CTTTGACTTTATCGTCAAGTTCGATTTGTTGGCCTACACCTTCTCTAAAACAGATTTCCCGTC 5'

5' CATTTGTACAAGGAAAAACCAGCCACTCAGCCAGTGAAG 3'  
3' GTAAACATGTTCCTTTTTGGTTCGGT**GAGTCCGGTCACTTC** 5'

6-49

### Exon 51

5' CTCCTACTCAGACTGTTACTCTGGTGACACAACCTGTGGTTACTAAGGAACTGCCATCTCCA 3'  
3' GAGGAT**GAGTCTGACAATGAGACC**ACTGTGTTGGACACCAATGATTCCTTTGACGGTAGAGGT 5'

7-51

8-51

5' AACTAGAAATGCCATCTTCCTTGATGTTGGAGGTACCTGCTCTGGCAGATTTCAACCGGGCTT 3'  
3' TTGATCTTTACGGTAGAAGGAACTACAACCTCCATGGACGAGACCGTCTAAAGTTGGCCCCGAA 5'

5' GGACAGAACTTACCGACTGGCTTTCTCTGCTTGATCAAGTTATAAAATCACAGAGGGTGATGG 3'  
3' CCTGTCTTGAATGGCTGACCGAAAGAGACGAACTAGTTCAATATTTTAGTGTCTCCCACTACC 5'

5' TGGGTGACCTTGAGGATATCAACGAGATGATCATCAAGCAGAAG 3'  
3' ACCCACTGGAACCTATAGTTGCTCTACTAGTAGTTTCGTCTTC 5'

**Exon 52**

5' GCAACAATGCAGGATTTGGAACAGAGGCGTCCCCAGTTGGAAGAACTCATTACCGCTGCCCAA 3'  
3' CGTTGTTACGTCTCTAAACCTTGTCTCCGCAGGGGTCAACCTTCTTGAGTAATGGCGACGGGT 5'

**9-52**

**10-52**

5' AATTTGAAAAACAAGACCAGCAATCAAGAGGCTAGAACAAATCATTACGGATCGAA 3'  
3' TTAAACTTTTTGTTCTGGTTCGTTAGTTCTCCGATCTTGTTAGTAATGCCTAGCTT 5'

**Exon 53**

5' TTGAAAGAATTCAGAATCAGTGGGATGAAGTACAAGAACACCTTCAGAACCGGAGGCAACAGT 3'  
3' AACTTTCTTAAGTCTTAGTCCACCTACTTCATGTTCTTGTGGAAGTCTTGGCCTCCGTTGTCA 5'

**11-53**

**12-53**

**13-53**

5' TGAATGAAATGTTAAAGGATTCAACACAATGGCTGGAAGCTAAGGAAGAAGCTGAGCAGGTCT 3'  
3' ACTTACTTTACAATTCCTAAGTTGTGTTACCGACCTTCGATTCCTTCTTCGACTCGTCCAGA 5'

**14-53**

5' TAGGACAGGCCAGAGCCAAGCTTGAGTCATGGAAGGAGGGTCCCTATACAGTAGATGCAATCC 3'  
3' ATCCTGTCCGGTCTCGGTTTCGAACTCAGTACCTTCCTCCCAGGGATATGTCATCTACGTTAGG 5'

**15-53**

5' AAAAGAAAATCACAGAAACCAAG 3'  
3' TTTTCTTTTAGTGTCTTTGGTTC 5'

**Exon 58**

**16-58**

5' GCCTTCAAGAGGGAATGAAAACCTAAAGAACCTGTAATCATGAGTACTCTTGAGACTGTACGA 3'  
3' CGGAAGTTCTCCCTTAACCTTTGATTTCTTGGACATTAGTACTCATGAGAACTCTGACATGCT 5'

**17-58**

5' ATATTTCTGACAGAGCAGCCTTTGGAAGGACTAGAGAACTCTACCAGGAGCCCAGAG 3'  
3' **TATAAAGAC**TGTCTCGTCGGAAACCTTCCTGATCTCTTTGAGATGGTCTCGGGTCTC 5'

**18-58**



**Figure S1C.**

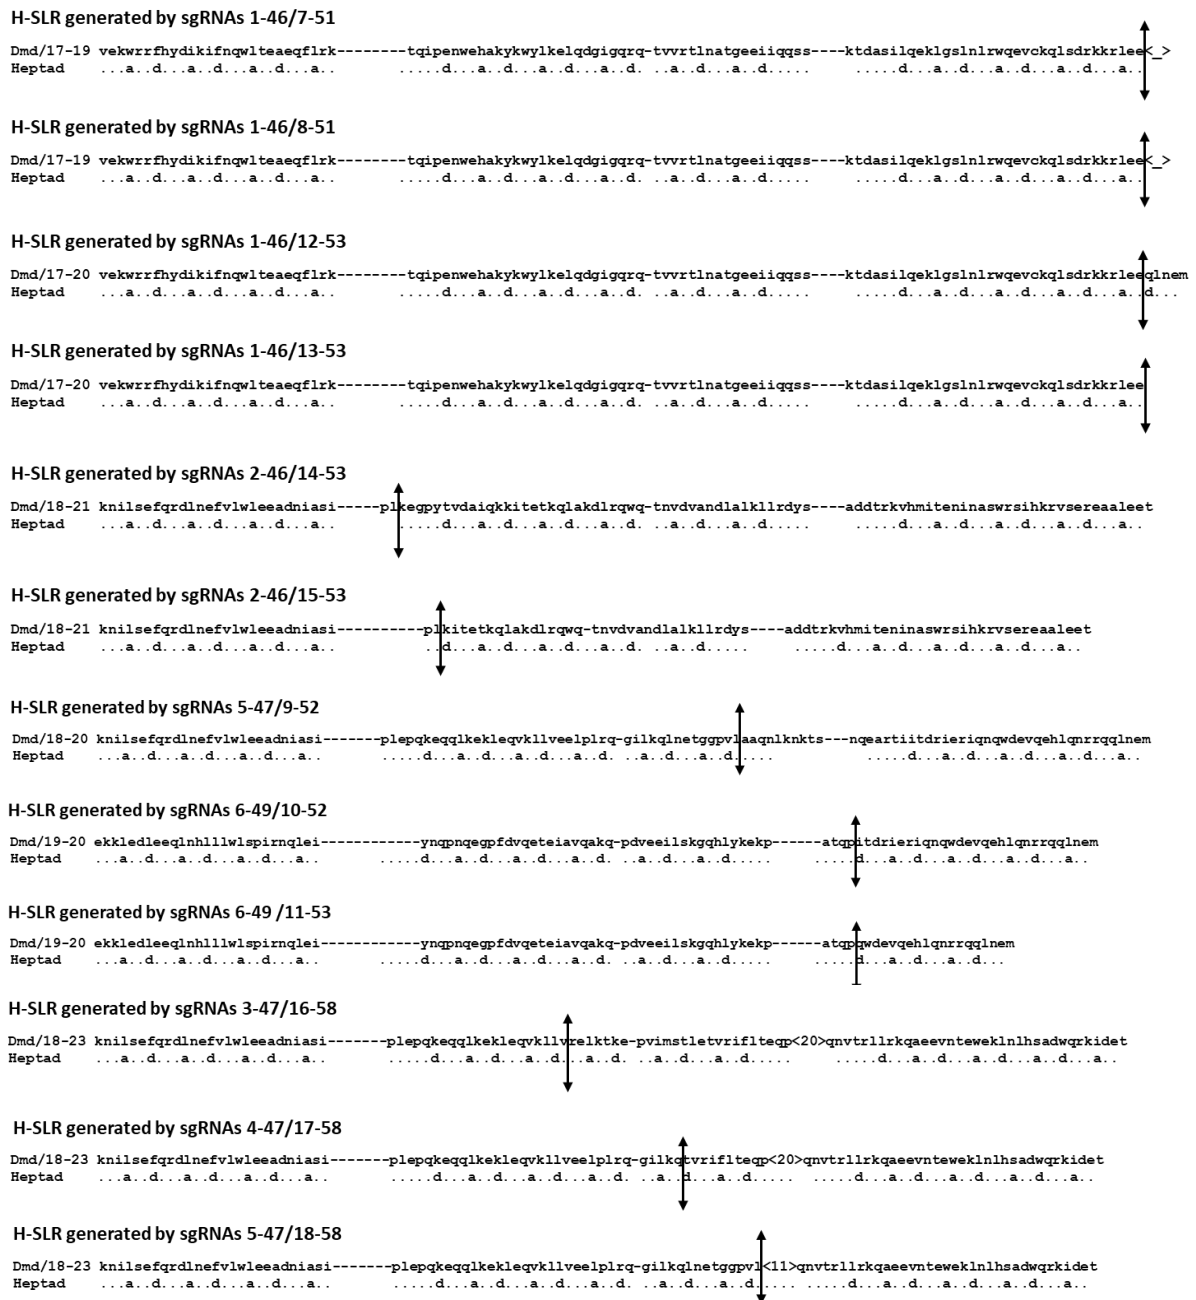

**Figure S1. *In silico* identification of sgRNAs for the SaCas9 suitable for the formation of hybrid spectrin-like repeats normally phased.** Potential target sites for SaCas9 sgRNAs were searched in exons 46 to 58 (except exon 50, which was deleted in the DMD patient used for our initial study). There was no SaCas9 PAM suitable for our approach in exons 48, 54, 55, 56 and 57. Panels show the nucleic acid

sequences targeted by the sgRNAs in exons 46, 47, 49, 51, 52, 53 and 58 of the human DMD gene. The exon sequences targeted by the sgRNAs (see table 1.) are in bold and the corresponding PAMs are underlined. Note that intronic sequences are not represented here. Since our strategy relies on the formation of hybrid exons that could result in the formation of a normally conformed spectrin-like repeat, we analysed where, in the corresponding amino-acid sequence, each sgRNA will cut. B) The amino acid sequences of helixes A, B and C are illustrated with the cut sites of each of the possible sgRNA. C) Based on these information, we were able to determine which pairs of sgRNAs could form a hybrid spectrin like repeat with preferably a hydrophobic amino-acid in the positions "a" and "d".

Figure S2A.

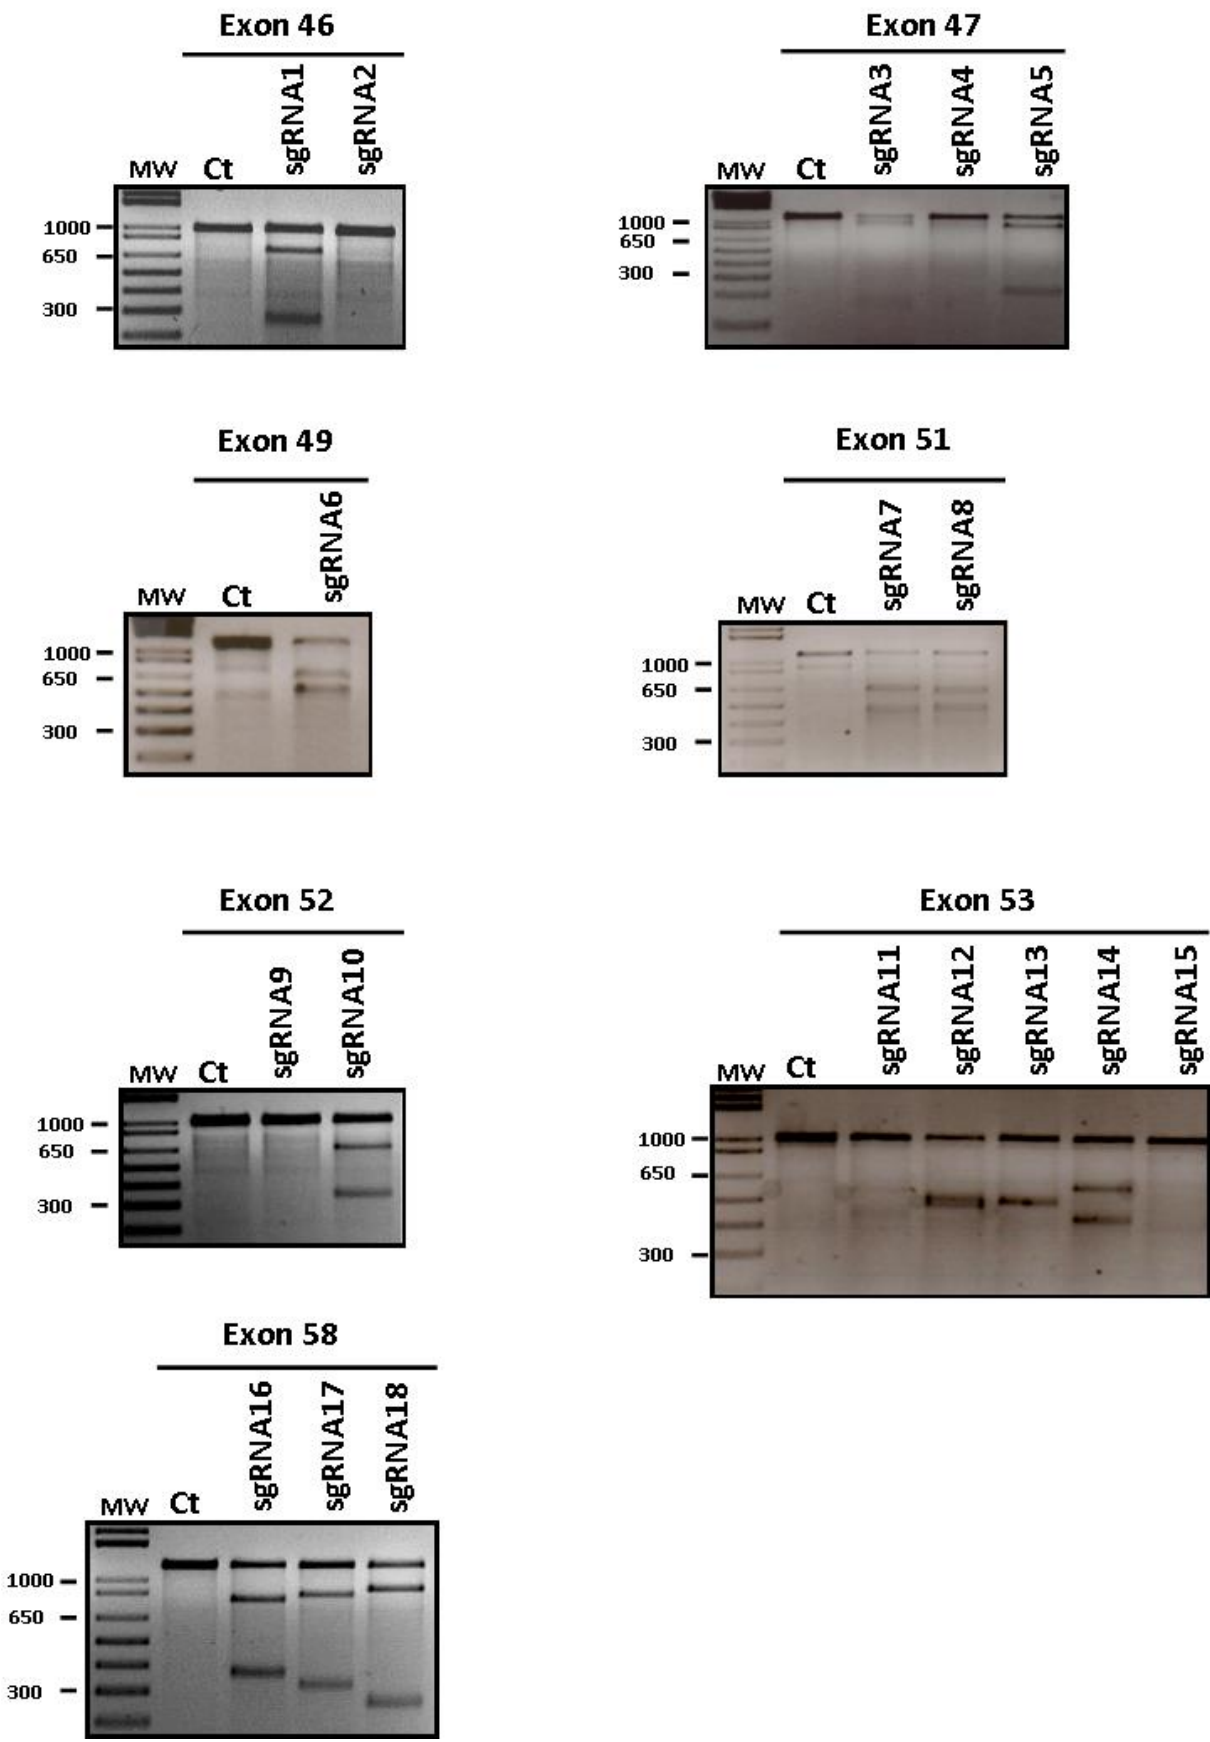

**Figure S2B.**

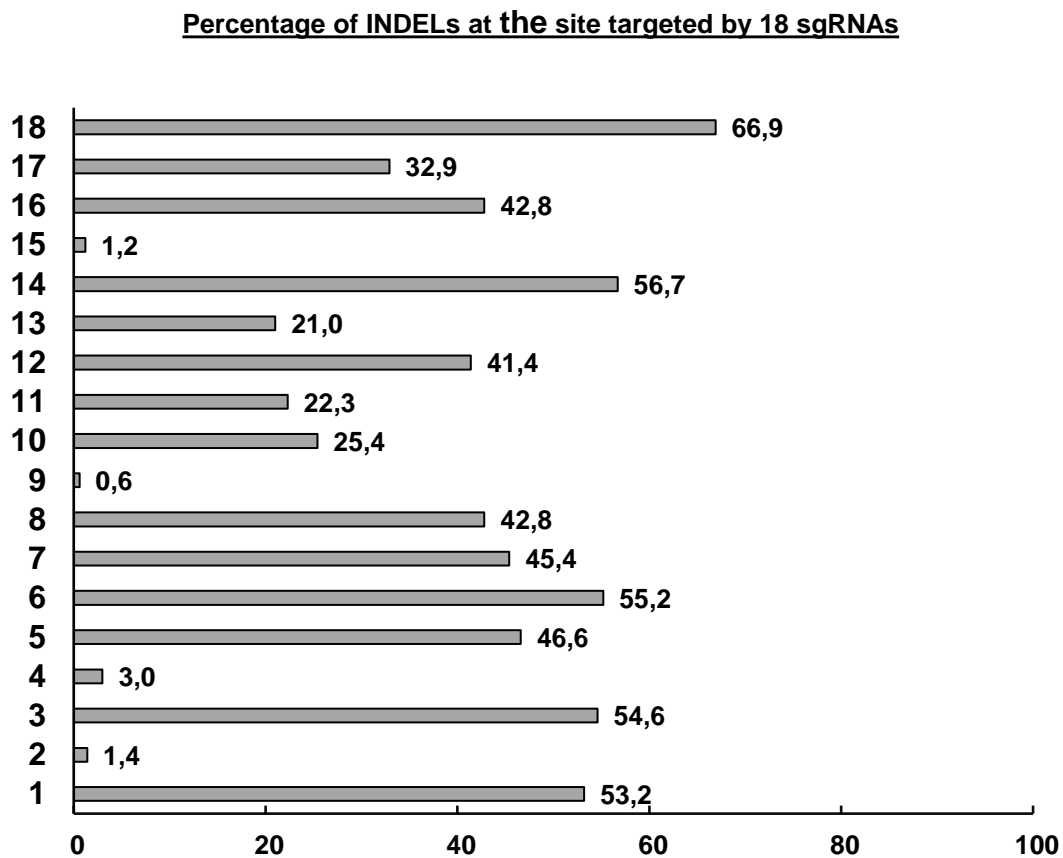

**Figure S2. TIDE profiles of INDEL formation generated by individual sgRNA tested in 293T.** A plasmid coding for each of the 18 possible SaCas9 sgRNAs was transfected in 293T cells. The targeted region of each sgRNA was PCR amplified. The Surveyor assay (S2A) was performed on genomic DNA extracted 48 h after the transfection. Genomic DNA of non-transfected cells was used as a control (Ct). The sgRNA numbers correspond to the targeted sequences (Table 1). MW: molecular weight marker. Among the tested sgRNAs, sgRNAs 9-52, 11-53 and 15-53 showed no detectable activity under the conditions tested while sgRNAs 1-46, 2-46, 3-47, 4-47, 5-47, 6-49, 7-51, 8-51, 10-52, 12-53, 13-53, 14-53, 16-58, 17-58 and 18-58 exhibited good efficiency as demonstrated by the Surveyor enzyme assay. Next, the presence of INDELS was determined by a TIDE analysis (<https://tide-calculator.nki.nl/>) (S2B).



We used amplicons from untreated 293T as a normal control sample. The figure illustrates the percentage of INDELS produced by each sgRNA. The sgRNAs 2, 4, 9 and 15 have a very low cutting activity which is in accordance with the Surveyor assay.

## Figure S3.

### Hybrid exons 46-51

SgRNAs 1-46/7-51

```
GCTAGAAGAAGTTACTCTGGTGACACAACCTGTGGTTACTAAGGAAACTGCCATCTCCAACTAGAAATGCCATCTTCCTTGATGTTGGAGGTA  
CCTGCTCTGGCAGATTTCAACCGGGCTTGGACAGAACTTACCGACTGGCTTCTCTGCTTGATCAAGTTATAAAATCACAGAGGGTGATGGTGG  
GTGACCTTGAGGATATCAACGAGATGATCATCAAGCAGAAG
```

SgRNAs 1-46/8-51

```
GCTAGAAGAAACACAACCTGTGGTTACTAAGGAAACTGCCATCTCCAACTAGAAATGCCATCTTCCTTGATGTTGGAGGTACCTGCTCTGGCA  
GATTTCAACCGGGCTTGGACAGAACTTACCGACTGGCTTCTCTGCTTGATCAAGTTATAAAATCACAGAGGGTGATGGTGGGTGACCTTGAGG  
ATATCAACGAGATGATCATCAAGCAGAAG
```

### Hybrid exons 46-53

SgRNAs 1-46/12-53

```
GCTAGAAGAACAGTTGAATGAAATGTTAAAGGATTCACACAATGGCTGGAAGCTAAGGAAGAAGCTGAGCAGGCTTTAGGACAGGCCAGAGCC  
AAGCTTGAGTCATGGAAGGAGGGTCCCTATACAGTAGATGCAATCCAAAAGAAAATCACAGAAACCAAG
```

SgRNAs 1-46/13-53

```
GCTAGAAGAAATTAAGGATTCACACAATGGCTGGAAGCTAAGGAAGAAGCTGAGCAGGCTTTAGGACAGGCCAGAGCCAAGCTTGAGTCATGG  
AAGGAGGGTCCCTATACAGTAGATGCAATCCAAAAGAAAATCACAGAAACCAAG
```

### Hybrid exon 49-52

SgRNAs 6-49/10-52

```
GAAACTGAAATAGCAGTTCAAGCTAAACAACCGGATGTGGAAGAGATTTGTCTAAAGGGCAGCATTTGTACAAGGAAAAACAGCCACTCAGC  
CAATTACGGATCGAA
```

### Hybrid exon 49-53

SgRNAs 6-49/11-53

```
GAAACTGAAATAGCAGTTCAAGCTAAACAACCGGATGTGGAAGAGATTTGTCTAAAGGGCAGCATTTGTACAAGGAAAAACAGCCACTCAGC  
CACAGTGGGATGAAGTACAAGAACACCTTCAGAACCGGAGGCAACAGTTGAATGAAATGTTAAAGGATTCACACAATGGCTGGAAGCTAAGGA  
AGAAGCTGAGCAGGCTTTAGGACAGGCCAGAGCCAAGCTTGAGTCATGGAAGGAGGGTCCCTATACAGTAGATGCAATCCAAAAGAAAATCACA  
GAAACCAAG
```

### Hybrid exons 47-58

SgRNAs 3-47/16-58

```
TTACTGGAGAGGGAATTGAAAATAAAGAACCTGTAATCATGAGTACTCTTGAGACTGTACGAATATTTCTGACAGAGCAGCCTTTGGAAGGAC  
TAGAGAAACTCTACCAGGAGCCAGAG
```

SgRNAs 5-47/18-58

```
TTACTGGTGGAGAGTTGCCCTGCGCCAGGGAATTCTCAAACAATTAATGAACTGGAGGACCCGTGCTGGAGCCAGAG
```

**Figure S3. Nucleotide sequences of the hybrid exons generated by SaCas9 and a pair of sgRNAs.** The beginning part of the exon targeted by the first sgRNA of a pair is highlighted in light grey and the remaining part of the exon targeted by the second sgRNA of the pair is highlighted in dark grey. These are nucleotide sequences of the hybrid exons generated during our experiments were exactly as expected.

Figure S4

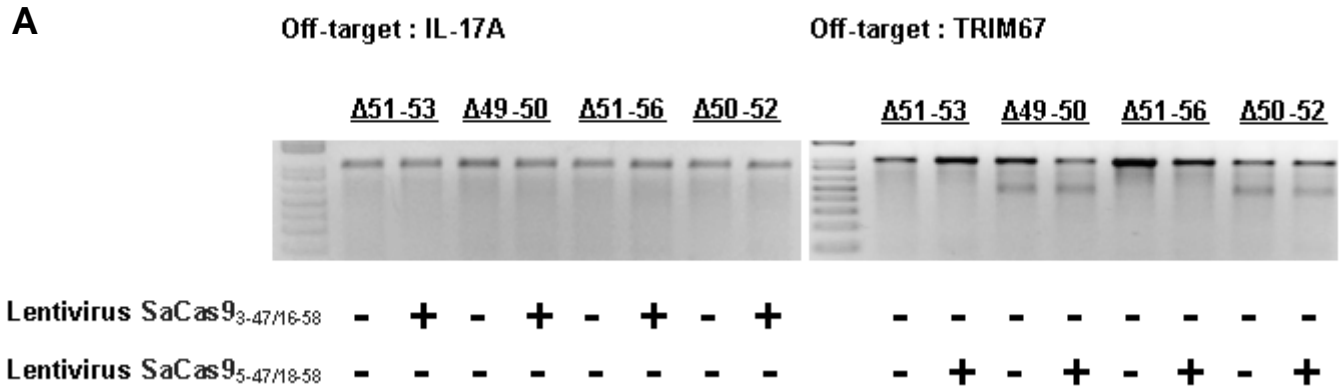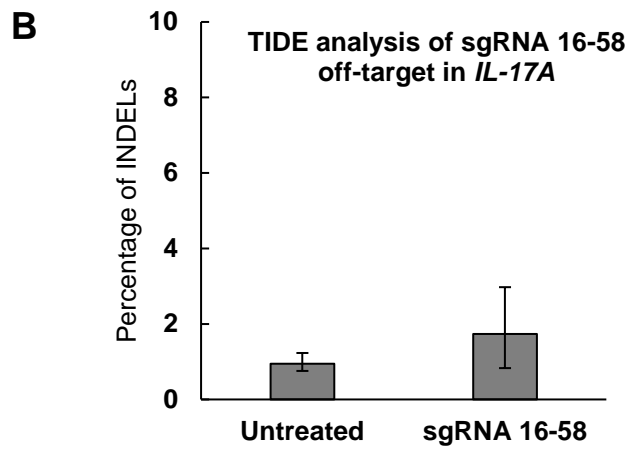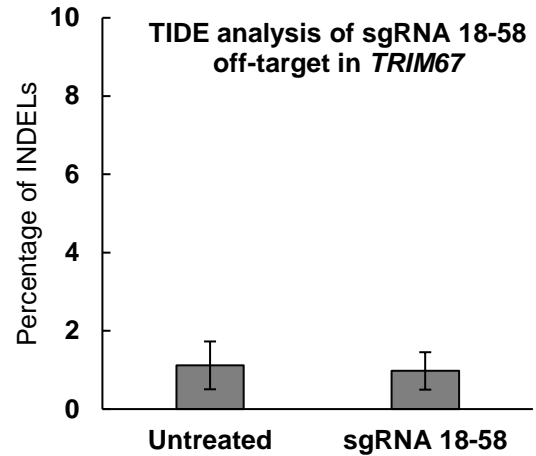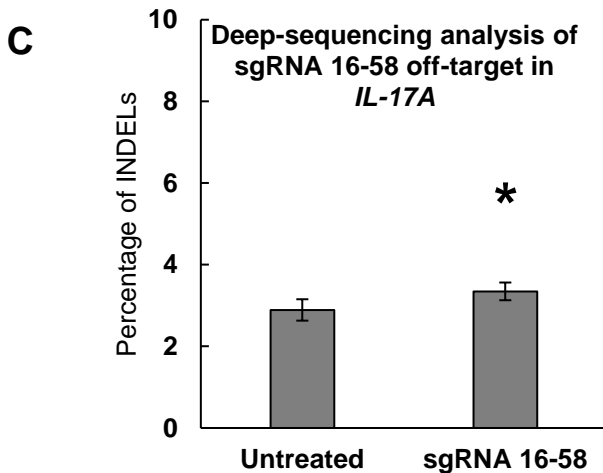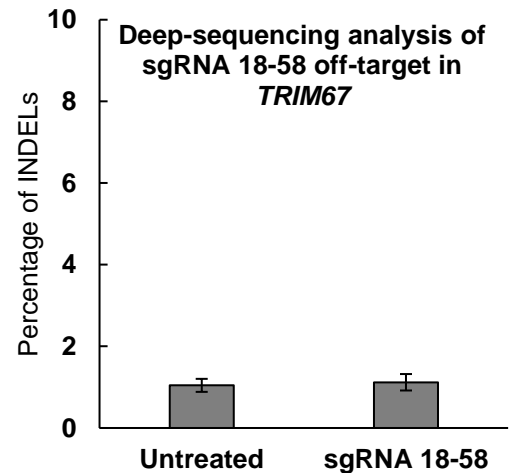

**Figure S4.** Analysis of the off-targets in the *IL-17A* and *TRIM67* genes. The potential off-targets were analysed by 3 methods: (A) Surveyor assay, (B) TIDE

analysis, (C) targeted deep-sequencing. These analyses were performed on genomic DNA extracted 4 weeks after infection of myoblasts from 4 DMD patients with Lentivirus-SaCas9-sgRNA3-47/16-58 or Lentivirus-SaCas9-sgRNA5-47/18-58. Untreated myoblasts from the same patients were used as controls. For TIDE analysis, the background percentage of INDELS was determined by comparison of untreated samples of the same four DMD patients and T-tests were performed. For deep-sequencing analysis, the background of INDELS was determined from the number of reads which nucleotide sequence differs from the wild-type in untreated samples, and paired T-tests were performed.
